# Supplementary material for: Solution-derived glass-ceramic NaI·Na3SbS4 superionic conductors for all-solid-state Na-ion batteries
Source: Royal Society of Chemistry journal article supplement (doi:10.1039/c8ta05537h), 2018-01-01
Supplement: c8ta05537h1.pdf [file c8ta05537h1.pdf]

[Supporting Information]

## **Solution-Derived Glass-Ceramic NaI·Na<sub>3</sub>SbS<sub>4</sub> Superionic Conductors for All-Solid-State Na-Ion Batteries**

Kern Ho Park,<sup>a</sup> Dong Hyeon Kim,<sup>a,b</sup> Hiram Kwak,<sup>a</sup> Sung Hoo Jung,<sup>a,b</sup> Hyun-Jae Lee,<sup>b</sup> Abhik Banerjee,<sup>a</sup> Jun Hee Lee<sup>b</sup> and Yoon Seok Jung<sup>\*,a</sup>

<sup>a</sup> *Department of Energy Engineering, Hanyang University, Seoul, 04763, South Korea*

<sup>b</sup> *School of Energy and Chemical Engineering, Ulsan National Institute of Science and Technology, Ulsan, 44919, South Korea*

\*E-mail: [yoonsjung@hanyang.ac.kr](mailto:yoonsjung@hanyang.ac.kr)

## Supporting Experimental Methods

For the measurement of H<sub>2</sub>S generated from Na<sub>3</sub>PS<sub>4</sub> and 0.1NaI·0.9Na<sub>3</sub>SbS<sub>4</sub>, the SE powders were kept in a sealed container (2.6 L) with a water (2 mL) in an open vial. A small electric fan circulated an air in the container and the relative humidity was 60-80%. The amount of H<sub>2</sub>S was measured using an H<sub>2</sub>S sensor (SP2297, SENKO). The XPS data were collected with a monochromatic Al K<sub>α</sub> source (1486.6 eV) at 72 W, 12 kV, and 6 mA using an X-ray photoelectron spectrometer (ThermoFisher).

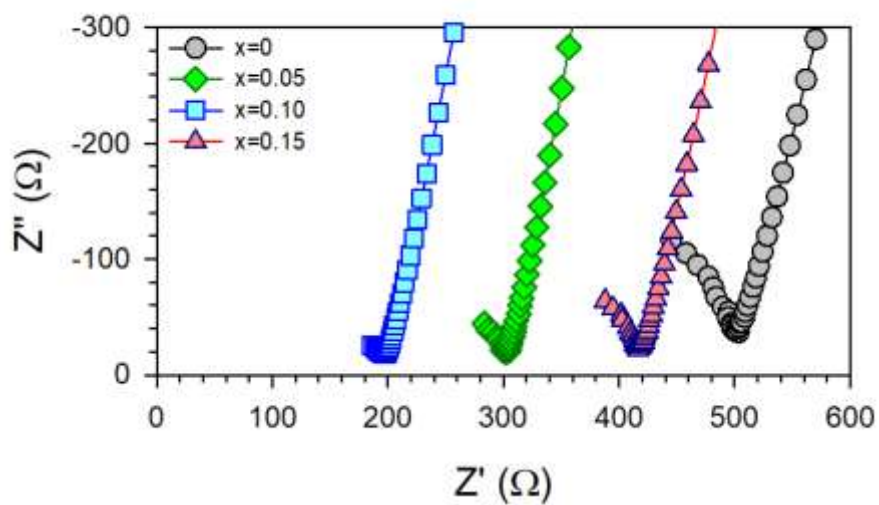

**Fig. S1** Nyquist plots at 30 °C for the solution-derived 0.1NaI·0.9Na<sub>3</sub>SbS<sub>4</sub> prepared at 150 °C.

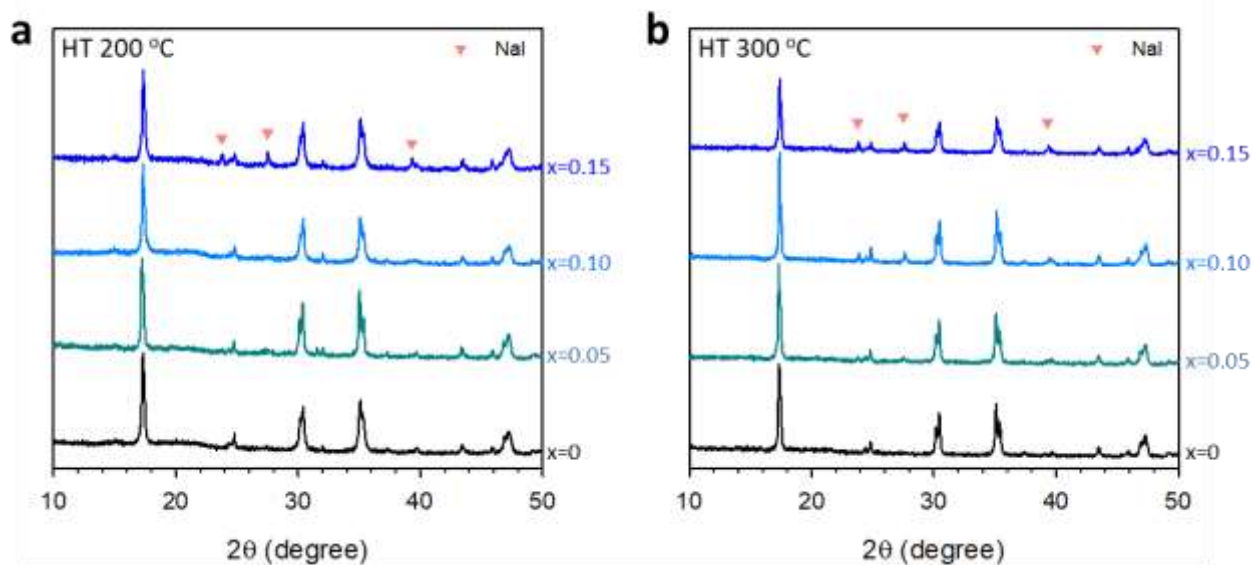

**Fig. S2** XRD patterns for the solution-derived  $x\text{NaI}\cdot(1-x)\text{Na}_3\text{SbS}_4$  prepared at a) 200 °C and b) 300 °C.

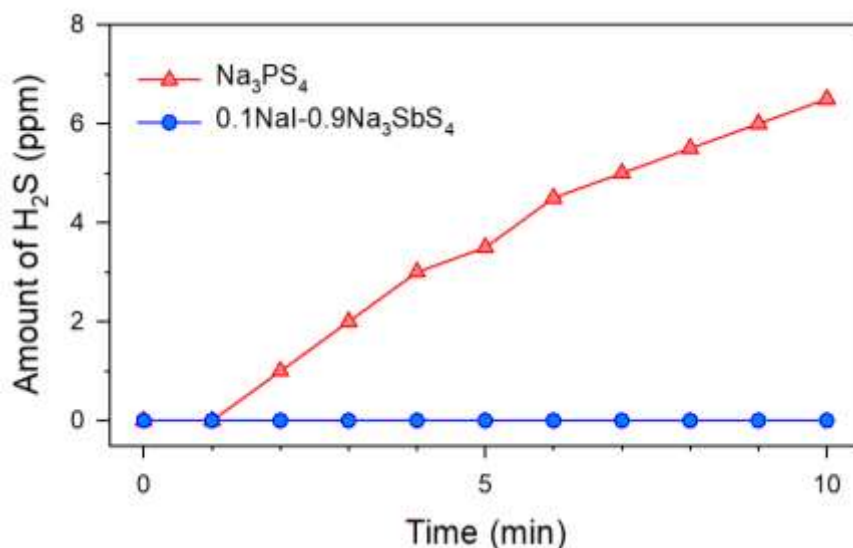

**Fig. S3** H<sub>2</sub>S amount as a function of time for Na<sub>3</sub>PS<sub>4</sub> and 0.1NaI·0.9Na<sub>3</sub>SbS<sub>4</sub> exposed in air.

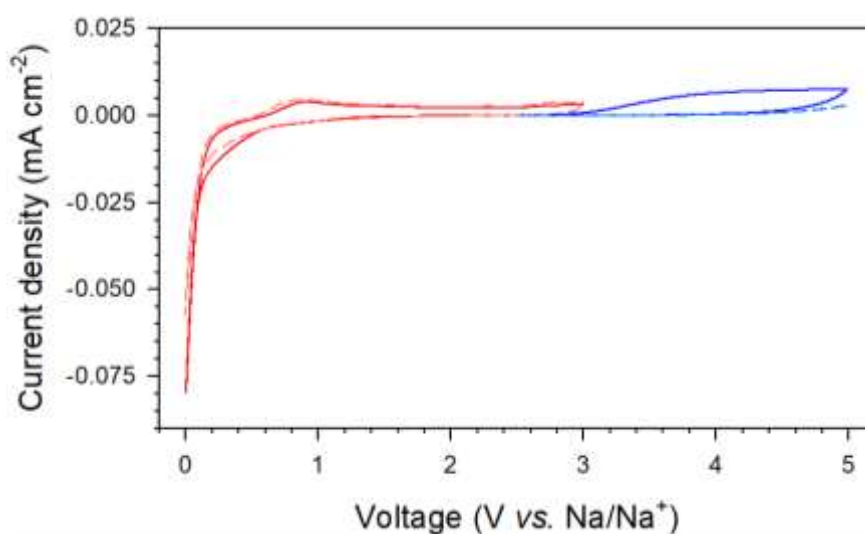

**Fig. S4** First two-cycle cyclic voltammery curves for Ti/0.1NaI·0.9Na<sub>3</sub>SbS<sub>4</sub>/Na<sub>3</sub>PS<sub>4</sub>/Na<sub>3</sub>Sn cells in the negative potential range (0.0-3.0 V (vs. Na/Na<sup>+</sup>)) and in the positive potential range (2.5-5.0 V (vs. Na/Na<sup>+</sup>)) at 30 °C. The solid and dashed lines are at first and second cycles, respectively. The scan rate was 20 mV s<sup>-1</sup>. 30 mg of 0.1NaI·0.9Na<sub>3</sub>SbS<sub>4</sub>, 100 mg of Na<sub>3</sub>PS<sub>4</sub>, and 60 mg of Na<sub>3</sub>Sn were used for the cells.

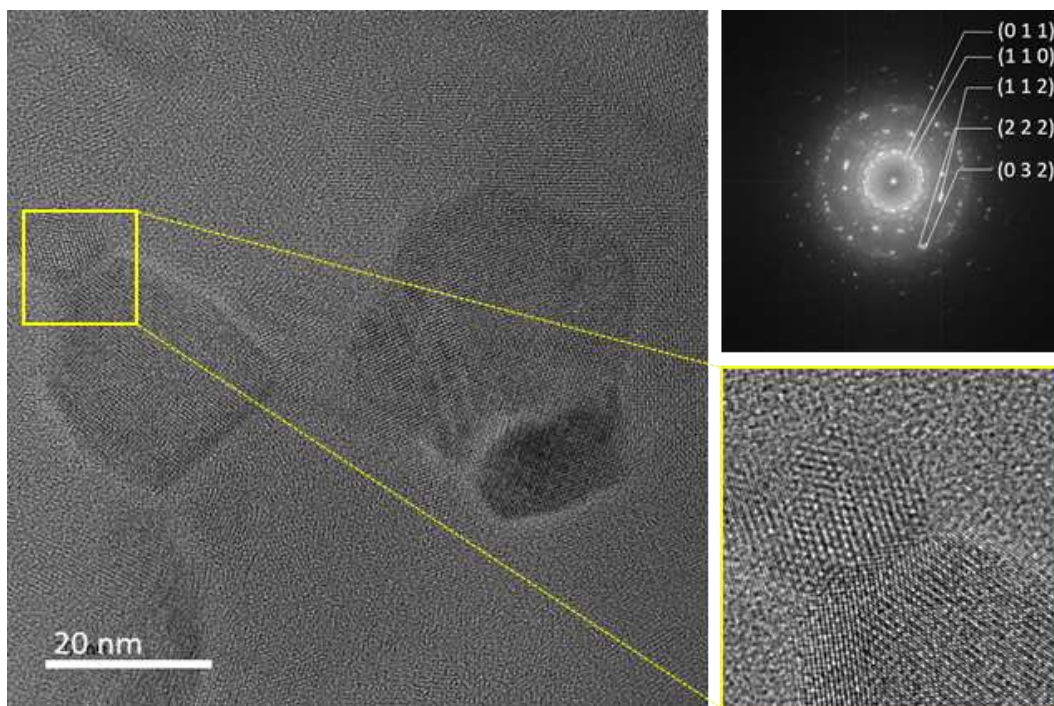

**Fig. S5** HRTEM image of the solution-derived  $0.1\text{NaI}\cdot 0.9\text{Na}_3\text{SbS}_4$  prepared at  $150\text{ }^\circ\text{C}$  and its corresponding FFT pattern. The spots in the FFT pattern correspond to  $\text{Na}_3\text{SbS}_4$ .<sup>10</sup>

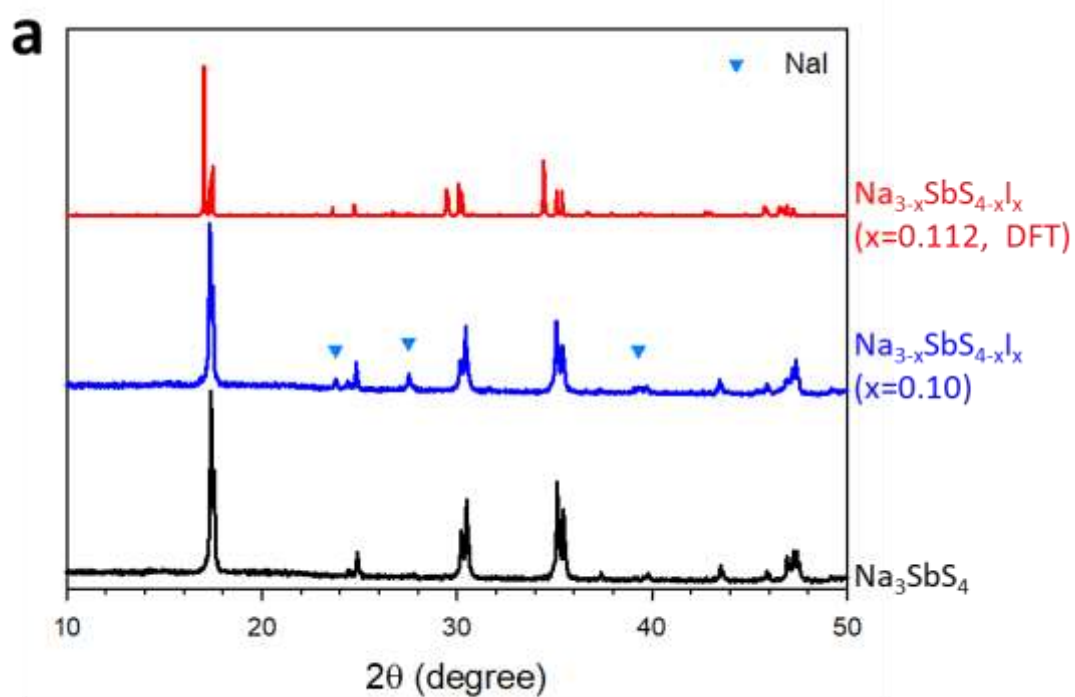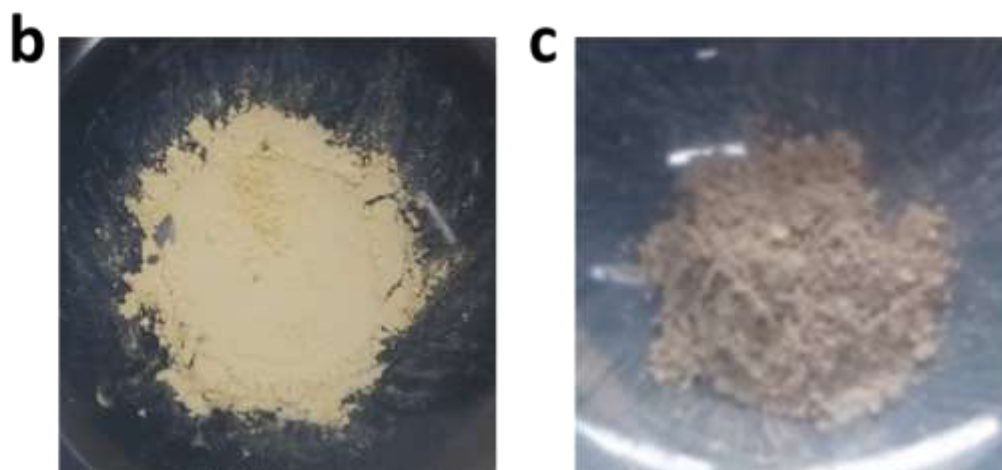

**Fig. S6** a) XRD patterns of  $\text{Na}_3\text{SbS}_4$  and  $\text{Na}_{3-x}\text{SbS}_{4-x}\text{I}_x$  ( $x = 0.10$ , nominal composition) prepared by the solid-state reaction at  $550\text{ }^\circ\text{C}$ . The DFT-calculated XRD pattern of  $\text{Na}_{3-x}\text{SbS}_{4-x}\text{I}_x$  ( $x = 0.112$ ) is compared. Photographs of b)  $\text{Na}_3\text{SbS}_4$  and c)  $\text{Na}_{3-x}\text{SbS}_{4-x}\text{I}_x$  ( $x = 0.1$ ) powders.

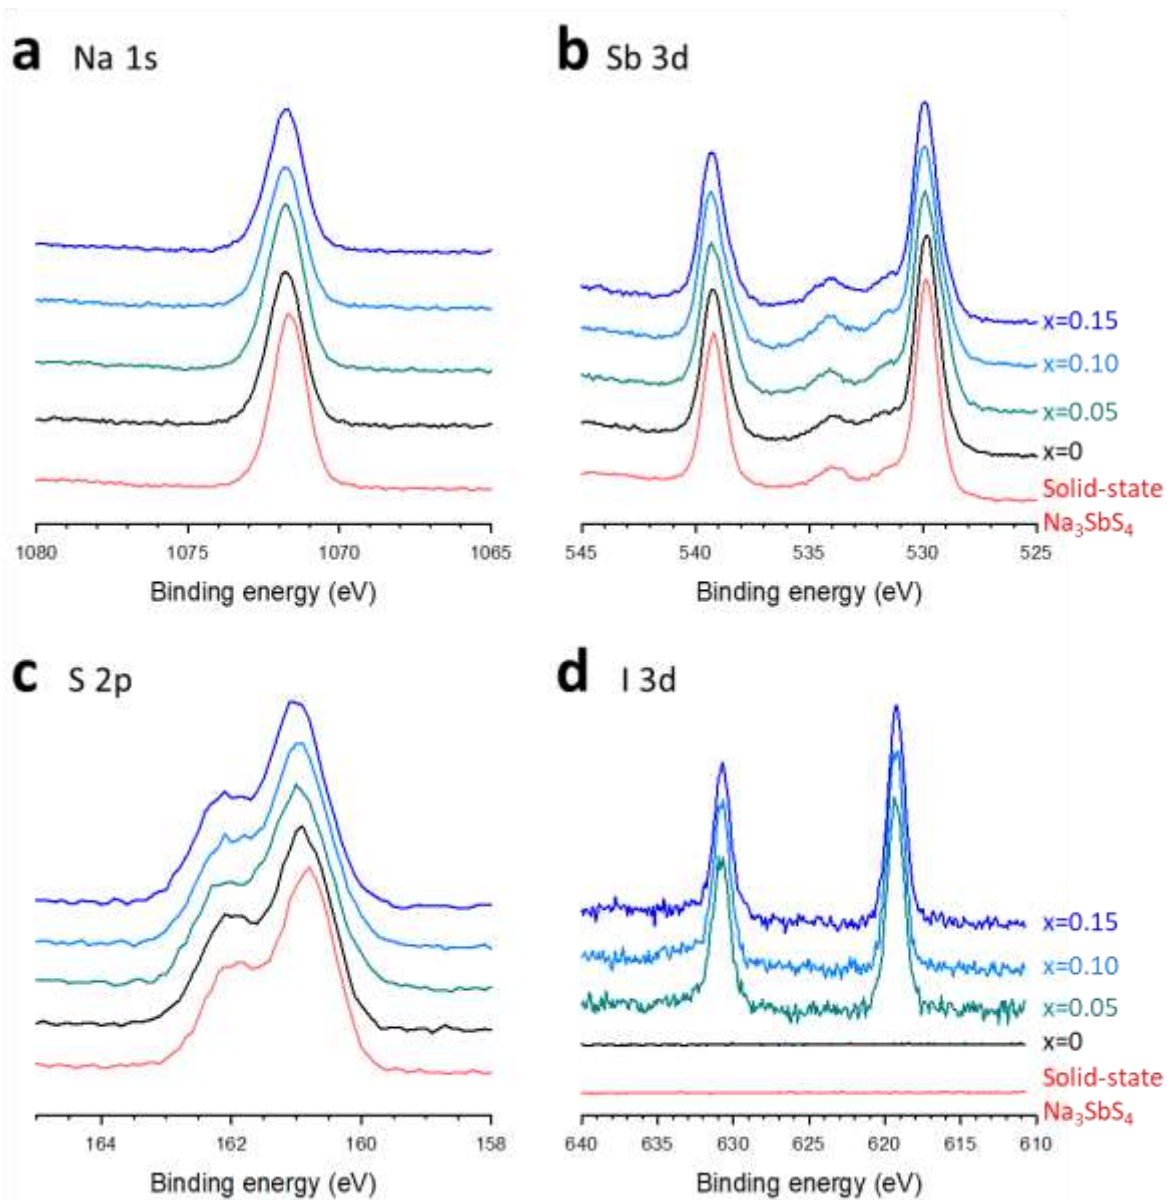

**Fig. S7** XPS spectra of a) Na 1s, b) Sb 3d, c) S 2p, and d) I 3d for the solution-derived  $x\text{NaI}\cdot(1-x)\text{Na}_3\text{SbS}_4$  prepared at 200 °C. The spectrum of  $\text{Na}_3\text{SbS}_4$  prepared by solid-state synthesis at 550 °C is compared.

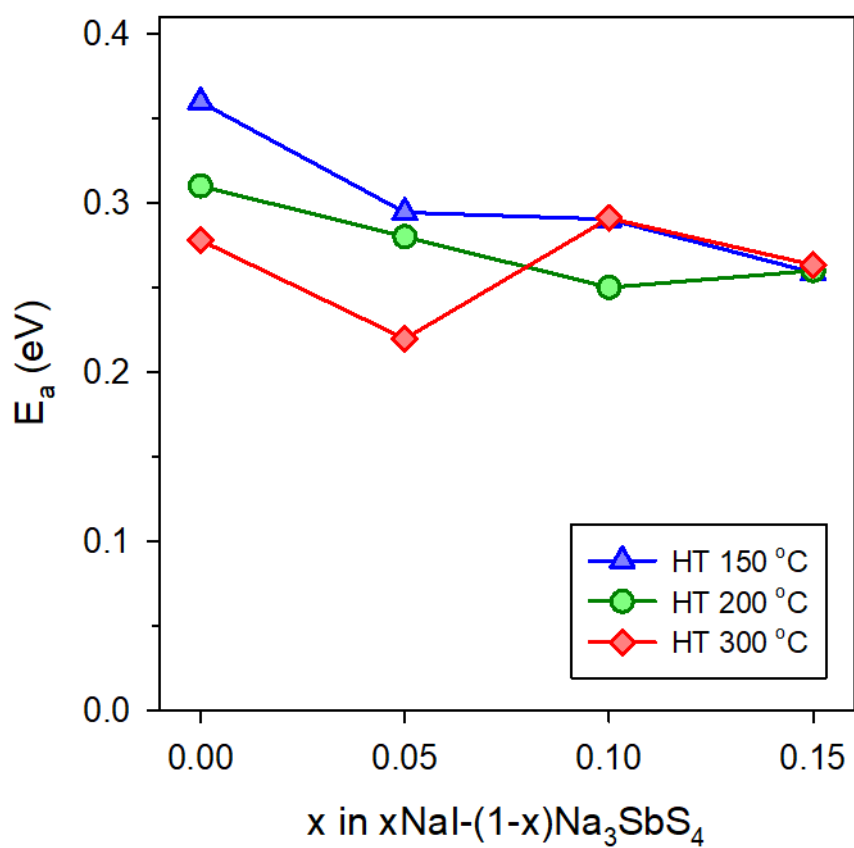

**Fig. S8** Activation energies of the  $\text{Na}^+$  conductivities for solution-derived  $x\text{NaI} \cdot (1-x)\text{Na}_3\text{SbS}_4$  prepared at 150, 200, or 300 °C.



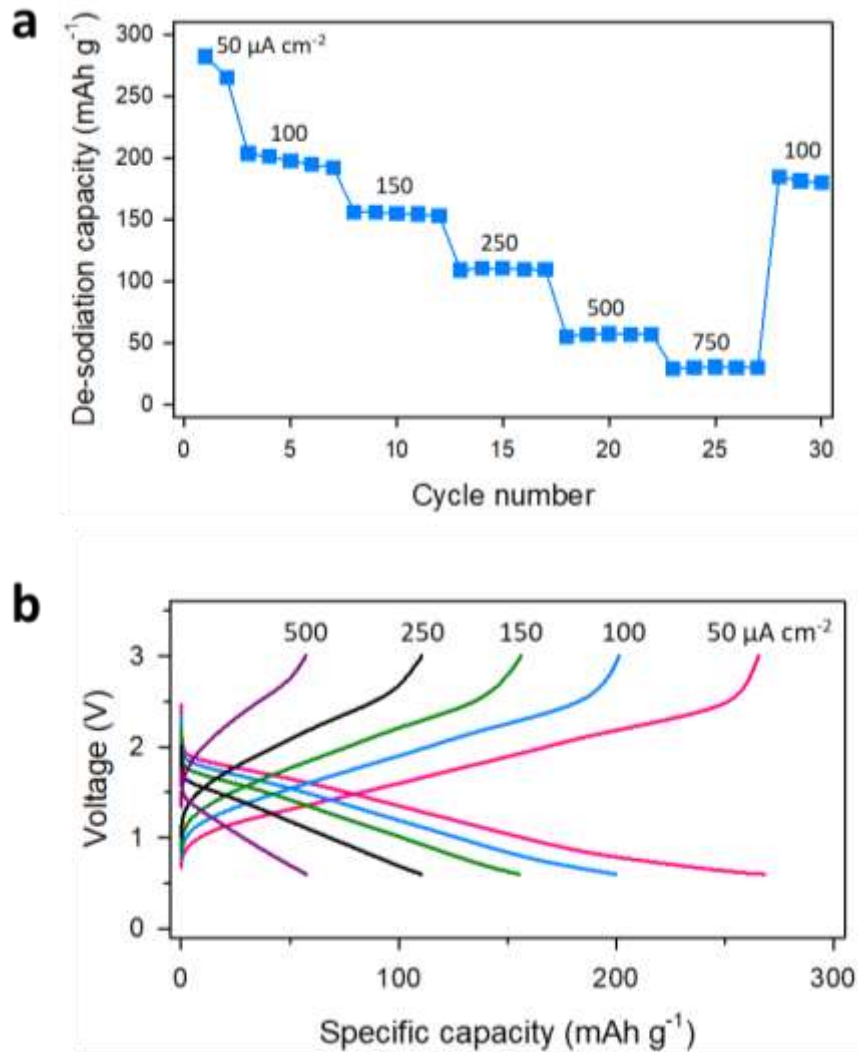

**Fig. S9** Rate capability results at 30 °C for FeS<sub>2</sub>/(Na<sub>3</sub>SbS<sub>4</sub>/Na<sub>3</sub>PS<sub>4</sub>)/Na<sub>3</sub>Sn all-solid-state cell using 0.1NaI·0.9Na<sub>3</sub>SbS<sub>4</sub>-coated FeS<sub>2</sub>. a) Discharge capacities and b) charge-discharge voltage profiles varied by the current density. The amount of coated 0.1NaI·0.9Na<sub>3</sub>SbS<sub>4</sub> was 20 wt%.

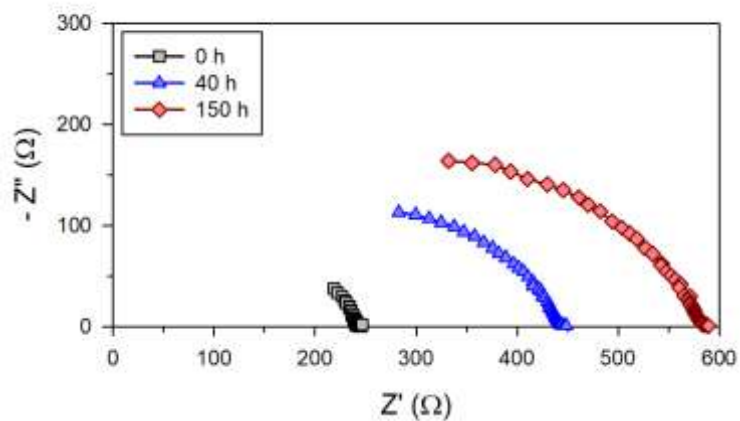

**Fig. S10** Nyquist plots at 30 °C for Na<sub>3</sub>Sn/Na<sub>3</sub>PS<sub>4</sub>/Na<sub>3</sub>Sn cells as a function of storage time.
